# Supplementary material for: Association of nefopam use with postoperative nausea and vomiting in gynecological patients receiving prophylactic ramosetron: A retrospective study
Source: PLoS One. 2018 Jun 28;13(6):e0199930. doi: 10.1371/journal.pone.0199930 (PMC6023139; doi:10.1371/journal.pone.0199930)
Supplement: S1 File — (XLSX) [file pone.0199930.s002.xlsx]

## Sheet: Sheet1
CaseNumber	Operation	Laparoscopic_1_open_0	Group	Age	Nausea_Opday	Vomiting_Opday	PONV_opday	Pain_opday	Nausea_POD1	vomiting_POD1	PONV_POD1	pain_POD1	Nausea_POD2	Vomiting_POD2	PONV_POD2	Pain_POD2	PCA_clamping	antiemetics	Reason_for_clamping	pain_median_3_days	Nausea_during_3days	Vomiting_during_3days	PONV_during_3days	Height	Weight	BMI	ASA	ASA_1or3	op_duration	2_volatile_1_intravenous	Smoking_status_0_Nonsmoking_status_1_current_smoker	Previous_Hx_of_PONV_absent=0_present=1
1	Pelviscopy prn explo lapa	1	1	44	0	0	0	4	0	0	0	4	0	0	0	3	0	0		4	0	0	0	157.4	50.9	20.55	1	1	135	1	0	0
2	Explorative laparotomy (Gyn)	0	1	52	0	0	0	10	0	0	0	8	0	0	0	8	0	0		8	0	0	0	162.7	49.75	18.79	2	1	122	1	0	0
3	SPA BS	1	1	51	0	0	0	3	0	0	0	3	0	0	0	3	0	0		3	0	0	0	154.9	52.5	21.88	1	1	12	1	0	0
4	SPA left ovarian cystectomy (benign)	1	1	41	0	0	0	4	0	0	0	3	0	0	0	3	0	0		3	0	0	0	169.3	77.45	27.02	2	1	60	1	0	0
5	SPA ROC (FROZEN)	1	1	24	0	0	0	4	0	0	0	4	0	0	0	3	1	0	Headache	4	0	0	0	174.5	82.4	27.06	1	1	73	1	1	0
6	SPA BSO	1	1	68	0	0	0	4	0	0	0	4	discharge	discharge	0	3	1	0	dizziness	4	0	0	0	157.4	55.8	22.52	2	1	45	1	0	0
7	Laparoscopy-assisted vaginal hysterectomy	1	1	48	1	0	1	6	0	0	0	3	0	0	0	3	1	0		3	1	0	1	158.3	74	29.53	1	1	95	1	0	0
8	BOC	0	1	42	0	0	0	5	0	0	0	4	0	0	0	3	0	0		4	0	0	0	149.7	58.35	26.04	2	1	90	1	0	0
9	LRH or LAVH PLND	1	1	51	0	0	0	4	0	0	0	4	1	0	1	4	1	1		4	1	0	1	156.7	53.69	21.87	1	1	390	1	0	0
10	Myomectomy	0	1	36	1	0	1	6	0	0	0	4	0	0	0	4	1	0		4	1	0	1	160.4	64.35	25.01	1	1	161	2	0	0
11	TAH BSO	0	1	56	0	0	0	7	0	0	0	7	0	0	0	5	1	0	gastric burn	7	0	0	0	158.9	57	22.57	2	1	178	2	0	0
12	Total abdominal hysterectomy	0	1	45	1	0	1	6	0	0	0	4	0	0	0	4	1	0		4	1	0	1	155.9	68.1	28.02	2	1	125	2	0	0
13	Pelviscopic bilateral salpingo-oophorectomy (benign)	1	1	62	0	0	0	4	0	0	0	4	0	0	0	3	0	0		4	0	0	0	152.3	59.45	25.63	2	1	80	2	0	0
14	Pelviscopic right salpingectomy with removal of tubal ectopic pregnancy	1	1	37	0	0	0	4	0	0	0	5	0	0	0	3	1	0	hypotension	4	0	0	0	164	67.55	25.12	1	1	70	2	0	0
15	debulking surgery	0	1	32	0	0	0	7	0	0	0	7	0	0	0	5	0	0		7	0	0	0	161.4	49.3	18.93	2	1	400	2	0	1
16	Pelviscopic bilateral salpingo-oophorectomy (benign)	1	1	66	0	0	0	5	0	0	0	4	0	0	0	3	1	0	Headache	4	0	0	0	161.2	59.15	22.76	2	1	35	2	0	0
17	Pelviscopic myomectomy	1	1	27	0	0	0	8	0	0	0	4	0	0	0	3	0	0		4	0	0	0	160.1	50	19.51	1	1	95	2	0	0
18	local excision of vulva	0	1	75	0	0	0	7	0	0	0	5	0	0	0	4	1	0	tolerable pain	5	0	0	0	155.4	56.1	23.23	2	1	420	2	0	0
19	LAVH-BSO	1	1	82	0	0	0	5	0	0	0	2	0	0	0	2	0	0		2	0	0	0	155.9	57.8	23.78	2	1	45	1	0	0
20	Laparoscopy-assisted vaginal hysterectomy	1	1	42	0	0	0	4	0	0	0	3	0	0	0	3	0	0		3	0	0	0	159.3	60.8	23.96	1	1	50	1	0	0
21	LAVH-BSO	1	1	57	0	0	0	7	0	0	0	3	0	0	0	3	0	0		3	0	0	0	162.1	69.45	26.43	2	1	85	1	0	0
22	Total abdominal hysterectomy	0	1	45	0	0	0	3	0	0	0	4	0	0	0	3	1	0	dizziness	3	0	0	0	168.2	65.4	23.12	1	1	100	1	0	0
23	LRH BS PLND nerve sparing	1	1	39	0	0	0	5	0	0	0	5	0	0	0	4	0	0		5	0	0	0	163.7	53.7	20.04	2	1	290	1	0	0
24	LAVH - USO or BSO -PLND-PALND	1	1	42	0	0	0	5	0	0	0	3	0	0	0	3	1	0	tolerable pain	3	0	0	0	158.3	64.2	25.62	2	1	100	1	0	0
25	LAVH BSO	1	1	60	0	0	0	7	1	0	1	5	1	0	1	4	1	1		5	1	0	1	160.2	63.4	24.7	2	1	80	2	0	0
26	Explorative laparotomy (Gyn)	0	1	45	0	0	0	7	0	0	0	5	0	0	0	4	0	0		5	0	0	0	156.7	55.85	22.74	2	1	180	1	0	0
27	LAVH BSO	1	1	53	0	0	0	5	0	0	0	3	0	0	0	3	0	0		3	0	0	0	165.4	70.5	25.77	2	1	195	1	0	0
28	Pelviscopic bilateral salpingo-oophorectomy (benign)	1	1	68	0	0	0	5	1	0	1	3	0	0	0	3	1	0		3	1	0	1	146.9	50.7	23.49	2	1	65	2	0	0
29	Radical hysterectomy BSO PLND PALND	0	1	55	0	0	0	7	0	0	0	5	0	0	0	3	0	0		5	0	0	0	145.4	53.75	25.42	1	1	175	1	0	0
30	Laparoscopy-assisted vaginal hysterectomy(prn, mini-lapa)	1	1	48	0	0	0	6	0	0	0	4	0	0	0	3	0	0		4	0	0	0	159.5	59.6	23.43	2	1	67	1	0	0
31	Explorative laparotomy (Gyn)	0	1	57	0	0	0	6	0	0	0	3	0	0	0	3	0	0		3	0	0	0	163	52.8	19.87	2	1	75	1	0	0
32	Mini lapa with ROC	0	1	24	0	0	0	7	0	0	0	4	0	0	0	4	0	0		4	0	0	0	158.2	48.95	19.56	1	1	95	1	0	0
33	LAVH-BSO-PLND-PALND	1	1	62	0	0	0	6	0	0	0	4	0	0	0	4	0	0		4	0	0	0	159.4	64.7	25.46	1	1	275	1	0	0
34	LAVH-BSO-PLND-PALND	1	1	59	0	0	0	5	0	0	0	4	0	0	0	3	0	0		4	0	0	0	152.7	61.8	26.5	1	1	95	1	0	0
35	LAVH-LSO,LSO or LOC	1	1	42	0	0	0	4	0	0	0	3	0	0	0	2	0	0		3	0	0	0	155.6	50.8	20.98	1	1	65	2	0	0
36	Total abdominal hysterectomy	0	1	44	0	0	0	4	0	0	0	4	0	0	0	3	0	0		4	0	0	0	167	73	26.18	1	1	185	2	0	0
37	TAH&BSO	0	1	56	0	0	0	7	0	0	0	4	0	0	0	3	1	0	headache	4	0	0	0	156.4	57.5	23.51	1	1	105	2	0	0
38	LAVH&BSO	1	1	72	1	1	1	6	0	0	0	5	0	0	0	5	1	1		5	1	1	1	158.5	65.7	26.15	1	1	60	2	0	0
39	laparoscopic staging operation	1	1	53	0	0	0	5	0	0	0	3	0	0	0	3	0	0		3	0	0	0	159.6	80.9	31.76	1	1	100	2	0	0
40	laparoscopic BSO	1	1	46	0	0	0	3	0	0	0	3	0	0	0	3	0	0		3	0	0	0	162.5	68.4	25.9	2	1	15	2	0	0
41	Total abdominal hysterectomy	0	1	35	0	0	0	5	0	0	0	7	0	0	0	3	0	0		5	0	0	0	164.9	77	28.32	1	1	120	2	0	0
42	TAH, BSO, BPLND, Omentectomy	0	1	79	0	0	0	6	0	0	0	3	0	0	0	3	0	0		3	0	0	0	152.6	58.15	24.97	2	1	165	2	0	0
43	Pelviscopic right ovarian cystectomy	1	1	22	0	0	0	4	0	0	0	4	0	0	0	3	0	0		4	0	0	0	166	54.3	19.71	1	1	70	2	0	0
44	Pelvi LSO	1	1	50	0	0	0	4	0	0	0	3	0	0	0	3	0	0		3	0	0	0	158.1	55.3	22.12	1	1	45	1	0	0
45	VTH-AP repair or ant.MESH	0	1	70	0	0	0	7	0	0	0	4	0	0	0	6	0	0		6	0	0	0	163.9	58.95	21.94	2	1	85	1	0	0
46	LAVH-BSO-PLND-PALND	1	1	43	0	0	0	5	0	0	0	4	0	0	0	3	1	0	dizziness	4	0	0	0	158.2	50.45	20.16	1	1	175	1	0	0
47	Explorative laparotomy (Gyn)	1	1	47	0	0	0	5	0	0	0	4	0	0	0	4	0	0		4	0	0	0	155.4	57.5	23.81	1	1	185	1	0	0
48	LAVH-BSO	1	1	49	0	0	0	6	0	0	0	3	0	0	0	5	0	0		5	0	0	0	164.7	62.25	22.95	1	1	68	2	0	0
49	Laparoscopy-assisted vaginal hysterectomy	1	1	50	1	0	1	8	1	0	1	5	0	0	0	3	1	0		5	1	0	1	157.8	45.8	18.39	2	1	200	1	0	0
50	LAVH-BSO	1	1	38	1	0	1	7	0	0	0	4	0	0	0	4	0	1		4	1	0	1	170	67.45	23.34	1	1	130	1	0	0
51	Pelviscopic left ovarian cystectomy (benign)	1	1	44	0	0	0	7	0	0	0	4	0	0	0	4	1	0	hypotension	4	0	0	0	162	56	21.34	1	1	64	2	0	0
52	Laparoscopic exploration ( high risk conversion to laparotomy)	1	1	49	0	0	0	4	0	0	0	4	0	0	0	3	0	0		4	0	0	0	161.4	57.35	22.02	2	1	110	1	0	0
53	Laparoscopic BSO with adhesiolysis	1	1	54	0	0	0	7	0	0	0	3	0	0	0	4	1	0	Headache	4	0	0	0	161	58.75	22.67	2	1	60	1	0	0
54	TMMR ( fusion trial )	0	1	73	0	0	0	0	0	0	0	8	0	0	0	4	1	0	sleeping tendency	4	0	0	0	150.4	63.35	28.01	2	1	310	1	0	0
55	Explorative laparotomy [Frozen]	0	1	54	0	0	0	8	0	0	0	4	0	0	0	3	1	0	headache	4	0	0	0	155.2	52.9	21.96	1	1	79	1	0	0
56	laparoscopic BSO	1	1	50	0	0	0	5	0	0	0	4	0	0	0	7	0	0		5	0	0	0	154.4	54.35	22.8	2	1	37	1	0	0
57	Radical hysterectomy, prn > exenteration	0	1	60	0	0	0	10	0	0	0	4	0	0	0	3	0	0		4	0	0	0	153.5	65.3	27.71	2	1	135	1	0	0
58	pelviscopic RSO, prn) Explorative laparotomy	1	1	52	0	0	0	4	0	0	0	3	0	0	0	3	0	0		3	0	0	0	154.6	58.4	24.43	1	1	40	1	0	0
59	Explorative laparotomy (Gyn)	0	1	50	0	0	0	5	1	0	1	6	0	0	0	7	1	1		6	1	0	1	158	72.8	29.16	1	1	328	1	1	0
60	laparoscopic left paraovarian cystectomy(Single port)	1	1	26	0	0	0	5	0	0	0	5	0	0	0	3	1	0	hypotension	5	0	0	0	160.3	56.2	21.87	1	1	50	1	0	0
61	laparoscopic left ovarian cystectomy(Single port)	1	1	39	0	0	0	3	0	0	0	3	0	0	0	2	0	0		3	0	0	0	160.2	56.4	21.98	1	1	90	1	0	0
62	Vaginal total hysterectomy with A and P repair	0	1	49	0	0	0	6	0	0	0	6	0	0	0	3	0	0	headache	6	0	0	0	161.5	61.85	23.71	2	1	180	1	0	0
63	TMMR fusion trial	0	1	63	0	0	0	8	0	0	0	5	0	0	0	4	0	0		5	0	0	0	151.8	60.6	26.3	2	1	385	1	0	0
64	Pelviscopic right salpingo-oophorectomy (benign)	1	1	41	0	0	0	4	0	0	0	4	0	0	0	3	0	0		4	0	0	0	158.2	54	21.58	1	1	145	1	0	1
65	Laparoscopy-assisted vaginal hysterectomy	1	1	46	1	0	1	3	0	0	0	4	0	0	0	3	1	1		3	1	0	1	161	59	22.76	1	1	130	1	0	0
66	Laparoscopic omentectomy/Paraaortic LND	1	1	51	0	0	0	5	0	0	0	4	0	0	0	3	0	0		4	0	0	0	155.6	56.5	23.34	2	1	155	1	0	0
67	Total abdominal hysterectomy	0	1	38	0	0	0	5	0	0	0	4	0	0	0	3	0	0		4	0	0	0	154	58.2	24.54	1	1	180	2	0	0
68	TAH+BSO	0	1	53	0	0	0	7	0	0	0	4	0	0	0	3	1	0	headache	4	0	0	0	152.2	56.1	24.22	1	1	125	2	0	0
69	Laterally extended endopelvic resection	0	1	60	0	0	0	0	0	0	0	6	0	0	0	3	0	0		3	0	0	0	153.2	58	24.71	2	1	455	2	0	1
70	Pelviscopic left ovarian cystectomy (benign)	1	1	25	0	0	0	4	0	0	0	3	0	0	0	3	1	0		3	0	0	0	164.3	53.3	19.74	1	1	60	2	0	0
71	Total abdominal hysterectomy	0	1	48	0	0	0	7	0	0	0	4	0	0	0	4	1	0		4	0	0	0	153.8	62.85	26.57	1	1	210	2	0	0
72	Vaginal total hysterectomy	0	1	69	0	0	0	5	0	0	0	4	0	0	0	5	1	0		5	0	0	0	162.9	62.75	23.65	1	1	181	2	0	0
73	Vaginal total hysterectomy with A and P repair, ICH	0	1	68	0	0	0	7	0	0	0	4	0	0	0	7	0	0		7	0	0	0	155.7	69.7	28.75	1	1	710	2	0	0
74	Total laparoscopic hysterectomy [ Single port ]	1	1	40	0	0	0	7	1	0	1	5	0	0	0	3	1	0		5	1	0	1	168.5	54	19.02	1	1	75	2	0	0
75	TLH, BSO [ Single port ]	1	1	43	0	0	0	5	0	0	0	3	0	0	0	3	0	0		3	0	0	0	155.9	61.5	25.3	1	1	45	2	0	1
76	Pelviscopic myomectomy [ Single port ]	1	1	20	1	0	1	3	1	0	1	5	0	0	0	2	1	1		3	1	0	1	160.6	62.6	24.27	2	1	45	2	0	0
77	Myomectomy	0	1	38	1	0	1	6	0	0	0	4	0	0	0	3	1	0		4	1	0	1	161	56.4	21.76	2	1	60	2	0	0
78	LAVH-BSO ( prn> explo-lapa )	1	1	69	1	0	1	8	1	0	1	7	0	0	0	3	1	0		7	1	0	1	153.5	63.5	26.95	2	1	50	1	0	0
79	LAVH with RSO, prn> BSO	1	1	43	0	0	0	4	0	0	0	2	0	0	0	3	0	0		3	0	0	0	159.5	55	21.62	1	1	60	1	0	0
80	Sacrospinous colpopexy or VTH-AP repair	0	1	67	0	0	0	8	0	0	0	4	0	0	0	3	0	0		4	0	0	0	158.9	68.1	26.97	2	1	53	1	0	0
81	LAVH-BSO/Omentectomy/PLND-PALND	1	1	62	0	0	0	4	0	0	0	3	0	0	0	3	0	0		3	0	0	0	153.2	58.75	25.03	1	1	225	1	0	0
82	Wide radical local excision with I-F lymph nodee dissection/pelviscopic PLND	0	1	69	0	0	0	4	0	0	0	4	0	0	0	4	0	0		4	0	0	0	148.9	45.35	20.45	2	1	170	1	0	0
83	Pelviscopic bilateral ovarian cystectomy (benign)	1	1	25	0	0	0	7	0	0	0	3	0	0	0	8	1	0		7	0	0	0	172	65.9	22.28	1	1	80	1	0	0
84	Hysteroscopic EM polypectomy, Pelvic ROC or RSO prn LAVH	1	1	38	0	0	0	4	0	0	0	3	0	0	0	3	1	0		3	0	0	0	166.5	80.95	29.2	1	1	115	1	0	0
85	Laparoscopy-assisted vaginal hysterectomy	1	1	41	0	0	0	7	0	0	0	4	0	0	0	3	0	0		4	0	0	0	158	62.7	25.12	1	1	80	1	0	0
86	Laparoscopy-assisted vaginal hysterectomy	1	1	47	0	0	0	6	0	0	0	3	0	0	0	3	0	0		3	0	0	0	163.8	74.2	27.66	1	1	55	1	0	0
87	LAVH(Single port)	1	1	48	0	0	0	7	0	0	0	4	0	0	0	3	1	0		4	0	0	0	160.3	44.85	17.45	1	1	55	1	0	0
88	Explorative laparotomy (Gyn)	0	1	33	0	0	0	7	0	0	0	5	0	0	0	7	0	0		7	0	0	0	162.1	58.2	22.15	1	1	75	1	0	0
89	Pelviscopic ROC'	1	1	40	0	0	0	3	0	0	0	3	0	0	0	3	0	0		3	0	0	0	158.9	53.4	21.15	1	1	65	1	0	0
90	laparoscopis staging operation	1	1	45	0	0	0	3	0	0	0	3	0	0	0	3	0	0		3	0	0	0	157.2	53.4	21.61	2	1	100	1	0	0
91	Explorative laparotomy (TAH + BSO + Om' + PLNS)	0	1	58	0	0	0	4	0	0	0	4	0	0	0	3	0	0		4	0	0	0	155.3	56.75	23.53	1	1	100	2	0	0
92	Laparoscopic ROC (Frozen)	1	1	26	0	0	0	7	1	0	1	5	0	0	0	3	1	0		5	1	0	1	159.7	56.6	22.19	1	1	70	1	0	0
93	TLH	1	1	49	0	0	0	5	0	0	0	4	0	0	0	3	0	0		4	0	0	0	152.3	65	28.02	1	1	60	1	0	0
94	Pelviscopic excision	1	1	59	0	0	0	5	0	0	0	3	0	0	0	3	0	0		3	0	0	0	160.1	60.5	23.6	1	1	45	1	0	0
95	LAVH	1	1	49	0	0	0	7	0	0	0	3	0	0	0	2	0	0		3	0	0	0	159.1	72.15	28.5	2	1	100	1	0	0
96	trachelectomy	0	1	30	0	0	0	5	0	0	0	6	0	0	0	3	0	0		5	0	0	0	166.6	89.95	32.41	1	1	145	1	0	0
97	lapa. Staging op	1	1	24	0	0	0	7	0	0	0	4	0	0	0	4	0	0		4	0	0	0	160.3	58.9	22.92	1	1	95	2	0	0
98	Explorative laparotomy	0	1	58	0	0	0	5	0	0	0	4	0	0	0	4	0	0		4	0	0	0	153.8	53.65	22.68	1	1	170	1	0	0
99	myomectomy	0	1	41	0	0	0	4	0	0	0	3	0	0	0	3	0	0		3	0	0	0	160.6	64.45	24.99	1	1	105	1	0	0
100	Pelviscopic left ovarian cystectomy (benign) [ Single port ]	1	1	30	0	0	0	5	0	0	0	4	0	0	0	3	0	0		4	0	0	0	168.2	65.4	23.12	1	1	80	2	0	0
101	Total abdominal hysterectomy	0	1	52	0	0	0	7	0	0	0	3	0	0	0	3	0	0		3	0	0	0	153	57.9	24.73	1	1	115	2	0	0
102	Pelviscopic bilateral ovarian cystectomy (benign)	1	1	33	0	0	0	4	0	0	0	3	removed	removed	0		0	0		3.5	0	0	0	166.1	53.3	19.32	1	1	55	1	0	0
103	Total laparoscopic hysterectomy [ Single port ]	1	1	44	0	0	0	4	0	0	0	4	removed	removed	0		1	0		4	0	0	0	159.3	58.8	23.17	2	1	50	2	0	0
104	LAVH with BS	1	1	45	0	0	0	6	0	0	0	5	removed	removed	0		1	0		5.5	0	0	0	158.5	53.1	21.14	1	1	80	1	0	0
105	Laparoscopy-assisted vaginal hysterectomy	1	1	37	1	0	1	6	1	0	1	4	0	0	0	3	0	1		4	1	0	1	162.8	61.35	23.15	1	1	60	1	0	0
106	LAVH - BSO	1	1	66	0	0	0	6	0	0	0	6	0	0	0	3	0	0		6	0	0	0	149.5	60.39	27.02	2	1	40	1	0	0
107	TAH-BSO-PLND-PALND	0	1	63	0	0	0	10	0	0	0	5	0	0	0	6	0	0		6	0	0	0	155.5	52.2	21.59	2	1	185	1	1	1
108	Pelviscopic right ovarian cystectomy (benign)	1	1	22	0	0	0	5	0	0	0	3	0	0	0	3	0	0		3	0	0	0	165	46.9	17.23	1	1	70	1	0	0
109	P-LSO with H-guided Bx	1	1	53	0	0	0	4	1	0	1	4	removed	removed	0		1	0		4	1	0	1	162.7	64.95	24.5	1	1	35	1	0	0
110	LAVH	1	1	47	0	0	0	5	0	0	0	3	0	0	0	3	0	0		3	0	0	0	160.4	60.45	23.5	2	1	75	1	0	0
111	Pelviscopy with exploration	1	1	63	1	0	1	10	0	0	0	7	0	0	0	5	1	1		7	1	0	1	154.6	46.75	19.56	2	1	60	1	0	0
112	Laparoscopy-assisted vaginal hysterectomy	1	1	88	0	0	0	6	0	0	0	3	0	0	0	3	0	0		3	0	0	0	138.3	47.1	24.63	3	3	65	1	0	0
113	Laparoscopy-assisted vaginal hysterectomy	1	1	44	1	0	1	7	0	0	0	7	0	0	0	3	1	1		7	1	0	1	163	59.15	22.26	2	1	50	1	0	0
114	LEER trachelectomy	0	1	39	0	0	0	5	1	0	1	4	0	0	0	3	1	1		4	1	0	1	159.4	47.3	18.62	1	1	340	1	0	1
115	Pelviscopic right salpingo-oophorectomy (benign)	1	1	55	0	0	0	4	0	0	0	3	0	0	0	3	0	0		3	0	0	0	162.4	49.4	18.73	1	1	40	1	0	0
116	Laparoscopy-assisted vaginal hysterectomy	1	1	56	0	0	0	6	0	0	0	5	0	0	0	3	0	0		5	0	0	0	160.5	55	21.35	1	1	60	1	0	0
117	Explorative laparotomy (Gyn)	0	1	45	1	0	1	7	1	0	1	5	0	0	0	4	1	1		5	1	0	1	150.7	46.9	20.65	2	1	180	1	0	1
118	A and P repair	0	1	75	0	0	0	4	0	0	0	3	0	0	0	3	1	0	tolerable pain	3	0	0	0	152.7	51.7	22.17	2	1	99	2	0	0
119	TLH BSO	1	1	56	0	0	0	5	0	0	0	4	1	0	1	3	1	1		4	1	0	1	147.1	46.5	21.49	2	1	60	1	0	0
120	Pelviscopic pelvic lymph node dissection	1	1	44	0	0	0	6	0	0	0	3	0	0	0	4	0	0	hypotension	4	0	0	0	156.3	61	24.97	1	1	100	1	0	0
121	Vaginal total hysterectomy with A and P repair	0	1	71	1	1	1	6	0	0	0	6	0	0	0	7	1	1		6	1	1	1	149.6	53.35	23.84	2	1	75	1	0	1
122	SPA LOC	1	1	29	0	0	0	4	0	0	0	3	0	0	0	3	1	0	dizziness	3	0	0	0	164.4	49.8	18.43	1	1	55	1	0	0
123	SPA sacral colpopexy, AP-repair	1	1	75	0	0	0	7	1	0	1	4	1	0	1	3	1	1		4	1	0	1	148.6	67.95	30.77	1	1	205	1	0	0
124	P-lt. paratubal cystectomy or LSO	1	1	47	0	0	0	4	0	0	0	4	0	0	0	3	1	0	hypotension	4	0	0	0	169.9	54.9	19.02	1	1	25	1	0	0
125	SPA LOC	1	1	34	0	0	0	4	0	0	0	4	0	0	0	3	0	0		4	0	0	0	166.7	64.9	23.35	1	1	47	2	0	0
126	LRH, BSO, PLND-nerve sparing	1	1	50	1	0	1	6	1	0	1	6	0	0	0	4	1	1		6	1	0	1	158.3	61.4	24.5	1	1	150	1	0	1
127	Pelviscopic right salpingo-oophorectomy (benign)	1	1	58	0	0	0	4	0	0	0	4	0	0	0	3	0	0		4	0	0	0	159.1	47.5	18.77	1	1	45	1	0	0
128	Myomectomy	0	1	35	0	0	0	8	0	0	0	6	0	0	0	3	0	0		6	0	0	0	160.3	61	23.74	1	1	135	1	1	0
129	Total abdominal hysterectomy, bilateral salpingo-oophorectomy	0	1	47	0	0	0	7	0	0	0	4	0	0	0	4	0	0		4	0	0	0	150	65	28.89	2	1	190	2	0	0
130	Pelviscopic right salpingo-oophorectomy (benign)	1	1	59	0	0	0	4	0	0	0	3	0	0	0	2	0	0		3	0	0	0	149.5	57	25.5	1	1	53	1	0	0
131	Explorative laparotomy (Gyn)	0	1	50	0	0	0	8	0	0	0	3	0	0	0	3	0	0		3	0	0	0	158.1	78.85	31.55	1	1	195	1	0	0
132	Pelviscopic left salpingo-oophorectomy (benign)	1	1	48	0	0	0	7	0	0	0	5	0	0	0	3	0	0		5	0	0	0	159	66	26.11	2	1	30	1	0	0
133	SPA - ROC, Myomectomy	1	1	36	0	0	0	6	0	0	0	3	0	0	0	3	0	0		3	0	0	0	160.6	50	19.39	1	1	148	2	0	0
134	Pelviscopic bilateral ovarian cystectomy (benign)	1	1	46	0	0	0	4	0	0	0	4	0	0	0	3	0	0		4	0	0	0	165.1	46.6	17.1	2	1	120	2	0	0
135	Pelviscopic right salpingo-oophorectomy (benign)	1	1	49	0	0	0	4	0	0	0	3	0	0	0	3	0	0		3	0	0	0	150.3	61.6	27.27	2	1	30	2	0	0
136	Pelviscopic right ovarian cystectomy (benign)	1	1	30	0	0	0	5	0	0	0	3	0	0	0	3	0	0		3	0	0	0	161.2	64	24.63	1	1	60	2	0	0
137	Pelviscopic bilateral salpingo-oophorectomy (benign)	1	1	60	0	0	0	6	1	0	1	6	0	0	0	1	1	0		6	1	0	1	152.7	60.4	25.9	2	1	30	2	0	0
138	Myomectomy	0	1	36	0	0	0	7	0	0	0	4	0	0	0	3	0	0		4	0	0	0	146	43.95	20.62	1	1	65	2	0	0
139	Laparoscopy-assisted vaginal hysterectomy& ROC or RSO	1	1	42	1	0	1	6	0	0	0	7	0	0	0	3	0	0		6	1	0	1	166.7	96	34.55	1	1	130	2	0	0
140	Myomectomy [mini-lapa]	0	1	35	0	0	0	5	0	0	0	4	0	0	0	3	0	0		4	0	0	0	153.6	46.2	19.58	1	1	95	1	0	0
141	Explorative laparotomy (Gyn)	0	1	56	0	0	0	8	1	0	1	7	0	0	0	8	1	1	headache	8	1	0	1	159.8	50.8	19.89	1	1	225	1	0	0
142	Myomectomy [mini-lapa]	0	1	37	1	0	1	7	0	0	0	3	0	0	0	5	1	1		5	1	0	1	157.2	52.3	21.16	1	1	110	1	0	0
143	PMMR	0	1	45	0	0	0	3	1	0	1	5	0	0	0	4	1	0		4	1	0	1	163.8	63.4	23.63	1	1	252	1	0	0
144	Pelviscopic myomectomy	1	1	31	0	0	0	7	0	0	0	5	0	0	0	3	0	0		5	0	0	0	153.3	93.05	39.59	1	1	140	1	0	0
145	laparoscopic sacral colpopexy, BSO	1	1	77	0	0	0	4	0	0	0	4	0	0	0	3	0	0		4	0	0	0	151.4	53.95	23.54	2	1	100	1	0	0
146	TMMR (fusion trial )	0	1	45	0	0	0	5	0	0	0	4	0	0	0	3	0	0		4	0	0	0	160.5	62.9	24.42	1	1	365	1	0	0
147	Total laparoscopic hysterectomy + BS	1	1	47	0	0	0	7	1	1	1	4	0	0	0	3	1	1		4	1	1	1	160.2	47.85	18.64	1	1	90	1	0	0
148	pelviscopic mass removal ( cystectomy )	1	1	34	0	0	0	7	0	0	0	5	0	0	0	3	0	0		5	0	0	0	159.4	55.4	21.8	1	1	210	1	0	0
149	Pelviscopic bilateral salpingo-oophorectomy (benign)	1	1	58	0	0	0	5	0	0	0	3	0	0	0	3	0	0		3	0	0	0	153	60.8	25.97	1	1	25	1	0	0
150	TAH BSO	0	2	63	0	0	0	6	0	0	0	4	0	0	0	3	0	0		4	0	0	0	155.5	76.5	31.64	2	1	210	1	0	0
151	Pelviscopic right salpingo-oophorectomy [Single port]	1	2	48	0	0	0	5	0	0	0	4	0	0	0	3	0	0		4	0	0	0	159	61.95	24.5	2	1	80	1	0	0
152	Total abdominal hysterectomy	0	2	43	0	0	0	9	1	0	1	8	1	0	1	2	1	0		8	1	0	1	158.4	57.6	22.96	1	1	90	1	0	0
153	Colpocleisis	0	2	76	0	0	0	5	0	0	0	3	removed	removed	0		0	0		4	0	0	0	154.4	71.15	29.85	2	1	32	1	0	1
154	pelviscopic LSO, appendectomy [Single port]	1	2	35	0	0	0	6	0	0	0	4	0	0	0	4	0	0		4	0	0	0	161.8	97.75	37.34	2	1	50	1	0	0
155	pelviscopic myomectomy	1	2	44	0	0	0	6	0	0	0	3	0	0	0	3	0	0		3	0	0	0	166.5	79.6	28.71	2	1	80	1	1	0
156	TLH + BSO + PLND	1	2	50	0	0	0	8	0	0	0	3	0	0	0	4	0	0		4	0	0	0	157.2	62.85	25.43	2	1	122	1	0	0
157	TAH c BSO	0	2	49	0	0	0	5	0	0	0	3	0	0	0	3	0	0		3	0	0	0	152.3	50.8	21.9	2	1	210	2	0	0
158	Myomectomy	0	2	21	0	0	0	5	1	0	1	5	0	0	0	3	1	1		5	1	0	1	160.9	80.65	31.15	1	1	170	2	0	0
159	Explorative laparotomy	0	2	43	1	0	1	8	1	0	1	7	0	0	0	4	1	1		7	1	0	1	154	65.25	27.51	2	1	360	1	0	0
160	Total abdominal hysterectomy	0	2	46	0	0	0	6	0	0	0	7	0	0	0	7	0	0		7	0	0	0	152.1	46.6	20.14	2	1	80	1	0	0
161	Left ovarian cystectomy (SPA)	1	2	22	1	0	1	5	0	0	0	3	0	0	0	3	0	1		3	1	0	1	155	50	20.81	2	1	47	1	0	0
162	SPA LAVH	1	2	44	0	0	0	4	1	0	1	4	0	0	0	3	1	1		4	1	0	1	161.4	62.1	23.84	1	1	55	1	0	0
163	SPA ROC	1	2	30	0	0	0	3	0	0	0	4	0	0	0	4	0	0		4	0	0	0	174.4	54.3	17.85	1	1	50	1	0	0
164	LAVH (prn> BSO)	1	2	52	0	0	0	5	0	0	0	4	0	0	0	3	0	0		4	0	0	0	152.6	55.2	23.7	1	1	117	1	0	0
165	Explorative laparotomy	0	2	57	0	0	0	5	0	0	0	4	0	0	0	3	0	0		4	0	0	0	162.1	71.7	27.29	2	1	133	1	0	0
166	Pelvi-myomectomy+BOC	1	2	41	0	0	0	5	0	0	0	4	0	0	0	3	0	0		4	0	0	0	167.3	58.55	20.92	1	1	220	1	0	0
167	Pelviscopic BSO (Single port)	1	2	41	0	0	0	4	0	0	0	6	0	0	0	3	0	0		4	0	0	0	157.1	68.45	27.73	2	1	55	1	0	0
168	Pelviscopic LOC	1	2	29	0	0	0	7	0	0	0	4	0	0	0	3	0	0		4	0	0	0	162.9	66.7	25.14	1	1	75	1	0	0
169	SPA BSO	1	2	77	0	0	0	4	0	0	0	3	0	0	0	3	1	0	tolerable pain	3	0	0	0	156.1	65.2	26.76	2	1	53	1	1	0
170	Frozen Bx (If benign->SPA LSO, If germ cell tumor->SPA Staging operation	1	2	37	0	0	0	5	0	0	0	4	0	0	0	3	0	0		4	0	0	0	172.1	69.85	23.58	2	1	50	1	0	0
171	Explorative laparotomy including hysterectomy, BSO and splenectomy	0	2	51	0	0	0	7	0	0	0	5	0	0	0	3	0	0		5	0	0	0	157.8	59	23.69	2	1	225	1	0	1
172	LAVH+PLND+PaLND+OMT' (prn E-L)	1	2	64	0	0	0	3	0	0	0	4	0	0	0	3	1	0	sleeping tendency	3	0	0	0	153.2	75.3	32.08	2	1	255	1	0	0
173	LAVH (prn E-L)	1	2	44	1	0	1	6	0	0	0	8	0	0	0	3	1	1		6	1	0	1	161.3	74.4	28.6	2	1	89	1	0	0
174	Pelviscopic ROC	1	2	31	0	0	0	5	0	0	0	4	0	0	0	4	0	0		4	0	0	0	167	54.4	19.51	2	1	22	1	0	0
175	Explorative laparotomy (Gyn)	0	2	30	1	0	1	8	0	0	0	4	0	0	0	4	1	0	headache	4	1	0	1	161.9	54.75	20.89	2	1	105	2	0	0
176	Explo-lapa TAH+BSO (Low midline)	0	2	78	0	0	0	7	0	0	0	8	0	0	0	3	0	0		7	0	0	0	146	49.75	23.34	2	1	240	2	0	0
177	LAVH+ BSO	1	2	45	0	0	0	4	0	0	0	3	0	0	0	3	0	0		3	0	0	0	159.8	56.2	22.01	2	1	55	2	0	0
178	Explorative laparotomy (Frozen)	0	2	38	0	0	0	3	0	0	0	4	0	0	0	4	0	0		4	0	0	0	167.4	66.75	23.82	1	1	117	2	0	0
179	TOT	0	2	60	1	0	1	4	0	0	0	3	discharge	discharge	0	discharge	1	1		3.5	1	0	1	164.6	71.65	26.45	2	1	85	2	0	0
180	(VTH+APR, prn> ICH	0	2	65	0	0	0	5	0	0	0	3	0	0	0	3	1	0	sleeping tendency	3	0	0	0	146.1	55.9	26.19	2	1	155	2	0	0
181	TOT mesh removal	0	2	52	0	0	0	4	0	0	0	3	0	0	0	3	0	0		3	0	0	0	156.2	62.3	25.53	1	1	120	2	0	0
182	Pelviscopic left oophorectomy (unilateral oophorectomy) single port	1	2	45	0	0	0	4	0	0	0	4	0	0	0	4	0	0		4	0	0	0	157.1	60	24.31	2	1	20	2	0	0
183	Laparoscopic ROC (single port)	1	2	20	1	0	1	5	1	0	1	4	0	0	0	3	1	1		4	1	0	1	153.4	53.35	22.67	1	1	40	2	0	0
184	Explorative laparotomy	0	2	56	0	0	0	5	0	0	0	6	0	0	0	5	0	0		5	0	0	0	157.2	57.85	23.41	2	1	425	1	0	0
185	LRH-PLND-PaLND	1	2	54	0	0	0	4	0	0	0	5	0	0	0	4	0	0		4	0	0	0	167.1	65.8	23.57	1	1	180	1	0	0
186	LRH-PLND	1	2	37	0	0	0	5	0	0	0	4	0	0	0	4	1	0	tolerable pain	4	0	0	0	163.9	51.6	19.21	2	1	240	1	0	1
187	LSO	1	2	68	1	0	1	7	1	0	1	3	1	0	1	3	1	1		3	1	0	1	165.4	44.3	16.19	2	1	55	1	0	0
188	TAH	0	2	50	0	0	0	6	0	0	0	4	0	0	0	4	0	0		4	0	0	0	165.6	73.2	26.69	1	1	118	1	0	0
189	LAVH-BSO PRN>PLND PALND,OMT'	1	2	56	0	0	0	3	0	0	0	3	0	0	0	4	0	0		3	0	0	0	152.2	48.1	20.76	1	1	180	1	0	0
190	TAH	0	2	36	0	0	0	6	0	0	0	6	0	0	0	5	0	0		6	0	0	0	159.6	62.05	24.36	2	1	95	1	0	1
191	TAH	0	2	46	0	0	0	5	0	0	0	4	0	0	0	3	1	0	dizziness	4	0	0	0	158.8	64.2	25.46	2	1	159	1	0	0
192	Laparoscopic type C1 hysterectomy	1	2	37	0	0	0	8	1	0	1	8	0	0	0	7	1	0		8	1	0	1	160	52	20.31	1	1	230	1	0	0
193	VTH+APR+ICH	0	2	62	0	0	0	6	0	0	0	4	0	0	0	3	0	0		4	0	0	0	152.2	57.55	24.84	2	1	184	2	0	0
194	Vaginal total hysterectomy	0	2	63	0	0	0	6	0	0	0	4	1	0	1	4	1	0		4	1	0	1	153	56.25	24.03	2	1	125	2	0	0
195	Laparoscopic LSO	1	2	46	0	0	0	7	0	0	0	3	0	0	0	3	0	0		3	0	0	0	154.1	55.1	23.2	2	1	50	2	0	0
196	pelviscopic RSO c frozen biopsy	1	2	43	0	0	0	3	0	0	0	3	0	0	0	3	0	0		3	0	0	0	159.6	63.55	24.95	1	1	100	2	0	0
197	Pelviscopic LOC + Hysteroscopic polypectomy	1	2	33	0	0	0	3	0	0	0	4	0	0	0	3	0	0		3	0	0	0	164.6	59.3	21.89	1	1	45	1	0	0
198	Pelviscopic ROC	1	2	34	0	0	0	4	0	0	0	4	0	0	0	4	0	0		4	0	0	0	166	48.3	17.53	1	1	45	1	0	0
199	Pelvi ROC prn Explo.lapa	1	2	30	0	0	0	7	1	0	1	4	0	0	0	3	1	1		4	1	0	1	158.1	50.95	20.38	1	1	150	2	0	0
200	TAH	0	2	42	0	0	0	5	0	0	0	4	0	0	0	4	0	0		4	0	0	0	163.4	65.65	24.59	2	1	160	1	0	0
201	Pelviscopic ROC (sinlge port)	1	2	42	0	0	0	4	0	0	0	4	0	0	0	3	0	0		4	0	0	0	167	93.95	33.69	2	1	66	2	0	0
202	Pelviscopic ROC(single port)	1	2	36	0	0	0	3	0	0	0	4	0	0	0	3	0	0		3	0	0	0	161.5	62.3	23.89	1	1	45	1	0	0
203	LAVH	1	2	42	0	0	0	4	0	0	0	4	0	0	0	3	0	0		4	0	0	0	157.7	54	21.71	2	1	196	1	0	0
204	Mini-lapa myomectomy (PRN hysterectomy)	0	2	46	0	0	0	7	0	0	0	4	0	0	0	4	0	0		4	0	0	0	164.2	47.75	17.71	2	1	80	1	0	0
205	LAVH	1	2	46	1	0	1	8	0	0	0	6	0	0	0	6	1	1		6	1	0	1	152.8	62.55	26.79	1	1	125	1	0	0
206	Pelviscopic LSO	1	2	55	0	0	0	4	0	0	0	4	0	0	0	3	0	0		4	0	0	0	155.3	53.85	22.33	1	1	50	1	0	0
207	Pelviscopic BOC	1	2	38	1	0	1	3	1	0	1	8	1	0	1	4	1	1		4	1	0	1	161.2	50	19.24	1	1	88	1	0	1
208	TAH	0	2	49	0	0	0	7	0	0	0	4	0	0	0	3	0	0		4	0	0	0	160.1	84.15	32.83	2	1	184	1	0	0
209	Pelviscopic ROC (single port) (prn RSO)	1	2	39	0	0	0	5	0	0	0	4	0	0	0	3	0	0		4	0	0	0	160.6	51.9	20.12	1	1	53	2	0	0
210	TAH BSO	0	2	89	0	0	0	7	0	0	0	4	0	0	0	3	0	0		4	0	0	0	147.5	64.4	29.6	2	1	155	2	0	0
211	Myomectomy	0	2	36	0	0	0	8	0	0	0	4	0	0	0	3	0	0		4	0	0	0	162.3	53.8	20.42	2	1	165	2	0	0
212	LEER (Laterally extended endopelvic resection)	0	2	67	0	0	0	7	0	0	0	4	0	0	0	3	0	0		4	0	0	0	154.5	66.2	27.73	2	1	150	1	0	0
213	Pelviscopic BOC	1	2	22	0	0	0	5	0	0	0	4	0	0	0	3	0	0		4	0	0	0	161.2	47.5	18.28	1	1	110	2	0	0
214	VTH+APR, ICH	0	2	72	1	0	1	10	1	0	1	5	1	0	1	3	1	1		5	1	0	1	159.1	60.45	23.88	2	1	155	2	0	0
215	Radical hysterectomy	0	2	51	0	0	0	8	1	0	1	4	0	0	0	4	1	0		4	1	0	1	155.6	45	18.59	2	1	150	2	0	0
216	Myomectomy	0	2	40	0	0	0	5	0	0	0	4	0	0	0	3	0	0		4	0	0	0	155.9	72.85	29.97	2	1	90	2	0	0
217	Pelviscopic BOC (Frozen, single port )	1	2	22	0	0	0	4	0	0	0	3	0	0	0	3	0	0		3	0	0	0	159.5	39.8	15.64	1	1	25	2	0	0
218	VTH with A-P repair	0	2	62	0	0	0	7	0	0	0	6	0	0	0	4	0	0		6	0	0	0	157.4	68.15	27.51	2	1	60	2	0	0
219	TLH+BS	0	2	45	1	0	1	5	0	0	0	6	1	0	1	5	1	1		5	1	0	1	174.7	58.7	19.23	2	1	155	2	1	0
220	Laparoscopic hysterectomy	1	2	39	0	0	0	5	0	0	0	5	1	0	1	6	0	1		5	1	0	1	159.5	45.7	17.96	2	1	175	2	0	1
221	Myomectomy	0	2	29	0	0	0	5	0	0	0	4	0	0	0	3	0	0		4	0	0	0	158.6	46.8	18.61	1	1	139	1	0	0
222	Total abdominal hysterectomy	0	2	45	0	0	0	5	0	0	0	4	0	0	0	4	1	0	headache	4	0	0	0	149.3	51.5	23.1	2	1	136	1	0	0
223	Laparoscopic ovarian ca. staging Op-Frozen	1	2	82	0	0	0	5	0	0	0	4	0	0	0	5	0	0		5	0	0	0	142.5	50.3	24.77	2	1	195	1	0	0
224	Radical hysterectomy c PLND/nerve sparing	0	2	32	0	0	0	6	0	0	0	5	0	0	0	4	0	0		5	0	0	0	163	66.25	24.94	2	1	295	1	0	0
225	VTH-AP or Ant MESH	0	2	63	0	0	0	8	0	0	0	4	0	0	0	4	0	0		4	0	0	0	155.3	55.05	22.83	2	1	60	1	0	0
226	Vaginal total hysterectomy with A and P repair	0	2	72	0	0	0	8	1	0	1	6	0	0	0	3	1	0		6	1	0	1	167.7	67.7	24.07	3	3	59	2	0	0
227	Laparoscopic MRH	1	2	55	0	0	0	6	0	0	0	4	1	0	1	3	0	1		4	1	0	1	157.8	50.5	20.28	1	1	70	1	0	0
228	LAVH	1	2	42	0	0	0	6	0	0	0	4	0	0	0	3	0	0		4	0	0	0	155.2	58.1	24.12	2	1	85	1	0	0
229	Laparoscopic Staging OP	1	2	53	0	0	0	8	1	0	1	6	0	0	0	4	1	1		6	1	0	1	155.9	55.8	22.96	2	1	190	1	0	0
230	Laparoscopy-assisted vaginal hysterectomy	1	2	48	0	0	0	5	0	0	0	4	0	0	0	3	0	0		4	0	0	0	154.5	62	25.97	2	1	75	2	0	0
231	Radical hysterectomy	0	2	46	0	0	0	4	0	0	0	4	0	0	0	4	0	0		4	0	0	0	156.2	55.1	22.58	2	1	140	1	0	0
232	LAVH c BSO	1	2	55	0	0	0	5	0	0	0	3	0	0	0	3	0	0		3	0	0	0	153	57.3	24.48	2	1	78	1	0	0
233	SPA LOC	1	2	27	0	0	0	6	0	0	0	5	0	0	0	3	0	0		5	0	0	0	155.4	44.2	18.3	1	1	47	1	0	0
234	TAH+BSO+P/PaLND	0	2	51	0	0	0	8	1	0	1	7	1	0	1	4	1	0		7	1	0	1	153	66	28.19	2	1	140	1	0	0
235	Vaginal total hysterectomy with A and P repair	0	2	49	0	0	0	0	0	0	0	4	0	0	0	4	0	0		4	0	0	0	150.3	55	24.35	2	1	173	1	0	0
236	Total laparoscopic hysterectomy c BSO	1	2	66	0	0	0	4	1	0	1	3	0	0	0	3	1	0		3	1	0	1	154	54.15	22.83	2	1	45	1	0	0
237	Pelviscopic bilateral salpingo-oophorectomy (single port)	1	2	52	0	0	0	4	0	0	0	4	0	0	0	3	0	0		4	0	0	0	156.5	56.6	23.11	1	1	50	2	1	0
238	Pelviscopic bilateral ovarian cystectomy (single port)	1	2	24	0	0	0	7	0	0	0	3	0	0	0	3	0	0		3	0	0	0	167.1	56.5	20.23	1	1	60	1	0	0
239	Pelviscopic bilateral ovarian cystectomy (Multiport)	1	2	41	1	0	1	5	1	0	1	3	0	0	0	3	1	1		3	1	0	1	166.4	66.15	23.89	2	1	170	1	0	0
240	Total laparoscopic hysterectomy	1	2	50	0	0	0	6	0	0	0	5	0	0	0	4	1	0	headache	5	0	0	0	157	66.72	27.07	2	1	190	1	0	0
241	Pelviscopic left salpingo-oophorectomy (benign)	1	2	46	0	0	0	3	0	0	0	3	0	0	0	3	0	0		3	0	0	0	164	70	26.03	1	1	40	1	0	0
242	Pelviscopic left salpingo-oophorectomy (benign)	1	2	49	0	0	0	8	0	0	0	5	0	0	0	3	1	0	headache	5	0	0	0	162	49.85	18.99	2	1	35	1	0	0
243	Pelviscopic operation -> prn Explorative laparotomy	1	2	51	0	0	0	8	0	0	0	7	0	0	0	6	0	0		7	0	0	0	155.1	54.1	22.49	2	1	280	1	0	0
244	Explorative laparotomy with TAH & BSO	0	2	50	0	0	0	7	0	0	0	4	0	0	0	3	0	0	dizziness	4	0	0	0	162.2	59.35	22.56	1	1	190	2	0	0
245	Pelviscopic bilateral salpingo oophorectomy	1	2	77	0	0	0	4	0	0	0	4	0	0	0	3	0	0		4	0	0	0	147.8	52.4	23.99	2	1	50	2	0	0
246	Pelviscopic left salpingo-oophorectomy (single port)	1	2	45	1	0	1	8	0	0	0	6	0	0	0	3	1	0		6	1	0	1	161.7	60.5	23.14	1	1	28	2	0	0
247	Pelviscopic right oophorectomy	1	2	36	0	0	0	5	0	0	0	4	0	0	0	3	0	0		4	0	0	0	168	67.4	23.88	1	1	70	2	0	0
248	Pelviscopic ovary cystectomy	1	2	21	0	0	0	5	0	0	0	3	0	0	0	3	0	0		3	0	0	0	166.7	58.7	21.12	1	1	105	2	0	0
249	Myomectomy	0	2	30	1	0	1	4	0	0	0	4	1	0	1	3	1	1		4	1	0	1	153.1	57.1	24.36	1	1	75	2	0	0
250	Pelviscopic LSO(FROZON)	1	2	41	0	0	0	3	0	0	0	3	0	0	0	3	0	0		3	0	0	0	168.6	59.15	20.81	2	1	30	2	0	0
251	Pelviscopic bilateral salpingo-oophorectomy	1	2	54	0	0	0	5	0	0	0	4	0	0	0	3	0	0		4	0	0	0	161.6	61.5	23.55	2	1	20	2	0	0
252	Diagnostic laparoscopy	1	2	39	0	0	0	3	0	0	0	4	0	0	0	3	1	0	hypotension	3	0	0	0	159	44.75	17.7	2	1	40	2	0	0
253	TAH, BSO	0	2	36	0	0	0	10	0	0	0	5	0	0	0	3	0	0		5	0	0	0	161.5	48.7	18.67	3	3	95	1	0	0
254	multiport laparoscopic both ovary cystectomy(Open 가능성 있음)	1	2	43	0	0	0	6	1	0	1	4	1	1	1	4	1	0		4	1	1	1	156.6	86.6	35.31	2	1	250	1	0	0
255	LRH-BSO-PLND-nerve sparing	1	2	59	0	0	0	4	0	0	0	4	0	0	0	4	0	0		4	0	0	0	161	55	21.22	1	1	180	1	0	0
256	LAVH-BSO	1	2	54	0	0	0	7	0	0	0	4	0	0	0	4	0	0		4	0	0	0	162.5	66.65	25.24	2	1	100	1	0	0
257	LAVH-BSO-PLND-PALND	1	2	56	1	0	1	5	0	0	0	4	0	0	0	3	1	1		4	1	0	1	161.3	54.45	20.93	1	1	187	1	0	1
258	Tension free vaginal tape (TVT) operation	0	2	74	0	0	0	5	0	0	0	3	0	0	0	3	0	0		3	0	0	0	153.1	65.5	27.94	3	3	25	2	0	0
259	Mini lapa ROC	0	2	32	0	0	0	5	1	0	1	6	0	0	0	3	1	1	nausea	5	1	0	1	156.1	49.2	20.19	1	1	85	1	0	0
260	LAVH + PLND (+PaLND)	1	2	34	0	0	0	4	0	0	0	4	0	0	0	3	0	0		4	0	0	0	157.3	109.6	44.29	1	1	210	1	0	0
261	Abdominal wall mass	0	2	39	0	0	0	5	0	0	0	4	0	0	0	3	1	0	dizziness	4	0	0	0	165.3	74.8	27.38	2	1	33	2	0	0
262	Explorative laparotomy (Gyn)	0	2	36	0	0	0	7	0	0	0	6	0	0	0	4	0	0		6	0	0	0	158.3	48.8	19.47	1	1	70	2	0	0
263	pelviscopic BSO	1	2	55	0	0	0	5	0	0	0	3	0	0	0	3	0	0		3	0	0	0	164.4	86.35	31.95	2	1	52	1	0	0
264	Explorative laparotomy	0	2	53	0	0	0	7	0	0	0	5	0	0	0	4	1	0		5	0	0	0	156.6	67.9	27.69	1	1	180	1	0	0
265	Diagnostic pelviscopy, repair of uterus (Prn, open)	1	2	78	0	0	0	5	0	0	0	4	0	0	0	3	0	0		4	0	0	0	160.9	72.6	28.04	2	1	94	2	0	0
266	TAH with same incision	0	2	42	0	0	0	8	1	0	1	5	0	0	0	3	1	0		5	1	0	1	151.9	60.55	26.24	1	1	165	1	0	0
267	Explorative laparotomy	0	2	22	1	0	1	6	1	0	1	7	0	0	0	4	1	1		6	1	0	1	159.1	57.15	22.58	1	1	70	1	0	0
268	LAVH-BSO-PLND-PALND+OMT	1	2	48	0	0	0	5	0	0	0	4	0	0	0	4	1	0		4	0	0	0	160	60.5	23.63	2	1	245	1	0	1
269	LAVH-BSO-PLND-PALND	1	2	56	0	0	0	7	0	0	0	4	1	0	1	5	1	0		5	1	0	1	163.5	62.6	23.42	2	1	140	1	0	0
270	LAVH	1	2	55	1	0	1	5	0	0	0	3	0	0	0	3	1	0		3	1	0	1	163.6	75	28.02	2	1	85	2	0	0
271	TAH+BSO	0	2	57	1	0	1	7	0	0	0	3	0	0	0	5	1	1		5	1	0	1	157.5	62	24.99	2	1	120	2	0	0
272	TAH	0	2	45	0	0	0	7	0	0	0	4	0	0	0	3	0	0		4	0	0	0	158	50.45	20.21	1	1	115	2	0	0
273	TAH	0	2	43	0	0	0	6	0	0	0	5	0	0	0	6	0	0		6	0	0	0	156.9	56.1	22.79	2	1	95	1	0	0
274	TLH using vaginal tube	1	2	67	1	0	1	5	0	0	0	6	0	0	0	3	1	1		5	1	0	1	156	56.75	23.32	1	1	60	2	0	0
275	Pelviscopic LOC' + prn myomectomy	1	2	39	0	0	0	6	0	0	0	3	0	0	0	3	0	0		3	0	0	0	162.7	50.5	19.08	1	1	50	2	0	0
276	(SCP with mesh, PR)	0	2	71	0	0	0	6	0	0	0	4	0	0	0	3	0	0		4	0	0	0	154.8	57.25	23.89	2	1	200	2	0	0
277	Laparoscopic BSO	1	2	45	0	0	0	4	0	0	0	4	0	0	0	3	0	0		4	0	0	0	157.3	54.7	22.11	2	1	25	2	0	0
278	TOT, AP-repair	0	2	50	0	0	0	5	0	0	0	3	0	0	0	3	0	0		3	0	0	0	163.7	62.4	23.29	1	1	25	2	0	0
279	Myomectomy	0	2	41	0	0	0	6	0	0	0	4	0	0	0	3	0	0		4	0	0	0	159.2	64.7	25.53	1	1	70	2	0	1
280	Explorative laparotomy	0	2	43	0	0	0	7	1	0	1	7	1	0	1	5	1	1		7	1	0	1	156.8	51	20.74	2	1	205	2	0	0
281	Pelviscopic RSO	1	2	54	1	0	1	4	0	0	0	4	0	0	0	3	1	1		4	1	0	1	156.2	66.5	27.26	1	1	65	1	0	0
282	Laparoscopy-assisted vaginal hysterectomy	1	2	44	1	0	1	7	1	0	1	7	1	0	1	3	1	1		7	1	0	1	161.4	52.8	20.27	2	1	55	1	0	0
283	Pelviscopic LSO	1	2	57	0	0	0	6	0	0	0	4	0	0	0	3	0	0		4	0	0	0	162.8	86.1	32.49	1	1	50	1	0	0
284	LAVH+BSO+ PLND+PALND	1	2	48	1	0	1	4	0	0	0	4	0	0	0	3	1	0		4	1	0	1	152.6	52.6	22.59	2	1	175	1	0	0
285	LAVH-BSO-PLND-PALND-Cholecystectomy	1	2	66	0	0	0	10	1	0	1	4	0	0	0	3	1	1		4	1	0	1	160.8	75.1	29.04	2	1	280	2	0	0
286	Explorative laparotomy (low midline)	0	2	56	1	0	1	5	1	0	1	3	0	0	0	3	1	0		3	1	0	1	154.9	52.2	21.76	1	1	90	1	0	0
287	Wide local excision with bilateral endoscopic groin lymph node dissection (SLN mapping)	0	2	67	0	0	0	5	0	0	0	5	0	0	0	3	0	0		5	0	0	0	158.4	69.45	27.68	2	1	210	1	0	0
288	Pelviscopic bilateral salpingo-oophorectomy	1	2	69	0	0	0	8	0	0	0	4	0	0	0	3	0	0		4	0	0	0	151.2	68.2	29.83	2	1	55	1	0	0
289	Pelviscopic Dx. with Op prn Myomectomy	1	2	33	0	0	0	5	0	0	0	4	0	0	0	3	1	0	headache	4	0	0	0	169.3	68.4	23.86	2	1	75	1	0	0
290	Total abdominal hysterectomy	0	2	41	0	0	0	4	0	0	0	4	0	0	0	4	0	0		4	0	0	0	158.2	63.05	25.19	2	1	145	1	0	0
291	Total abdominal hysterectomy+ BSO	0	2	61	0	0	0	4	1	0	1	3	1	0	1	3	1	1		3	1	0	1	162.5	66.55	25.2	2	1	215	2	0	0
292	Pelviscopic right ovarian cystectomy (benign)	1	2	19	0	0	0	8	1	0	1	3	0	0	0	3	1	0		3	1	0	1	160.7	84.55	32.74	1	1	65	1	0	0
293	Pelviscopic left oophorectomy (single port)	1	2	48	0	0	0	4	0	0	0	4	0	0	0	3	0	0		4	0	0	0	153.1	65.75	28.05	2	1	70	1	0	0
294	Total abdominal hysterectomy	0	2	45	0	0	0	7	0	0	0	3	0	0	0	3	0	0		3	0	0	0	154.1	53.15	22.38	1	1	78	1	0	0
295	Pelviscopic RSO (single port)	1	2	55	1	0	1	4	0	0	0	4	0	0	0	3	1	0		4	1	0	1	157.5	68.85	27.76	2	1	90	1	0	0
296	Laparosopic staging operation	1	2	37	0	0	0	6	0	0	0	6	0	0	0	3	0	0		6	0	0	0	171.6	69.8	23.7	2	1	117	1	0	0
